# Supplementary material
Source: PubMed Central journal article supplement (PMC3587211)
Supplement: 1222478110_pnas.201222478SI.pdf [file 1222478110_pnas.201222478SI.pdf]

# Supporting Information

Garai and Frieden 10.1073/pnas.1222478110

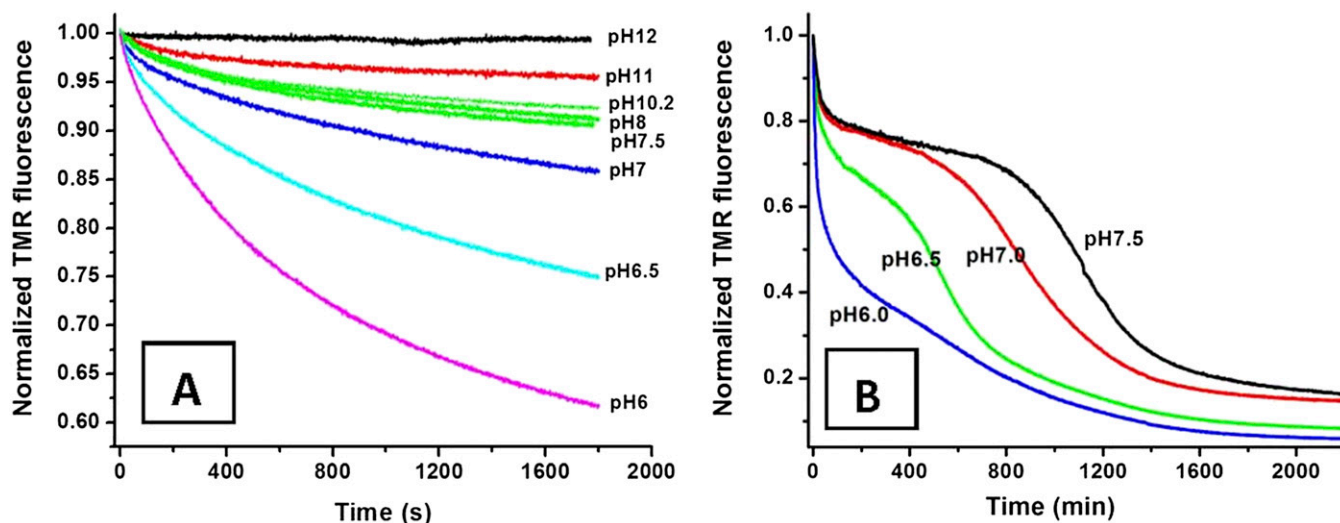

Fig. S1. pH dependence of oligomerization (A) and fibrillization (B) of tetramethylrhodamine (TMR)-amyloid  $\beta$  ( $A\beta_{1-42}$ ). (A) Time course of fluorescence change following dilution of a 100  $\mu$ M stock solution containing monomeric TMR- $A\beta_{1-42}$  prepared in 4 M GdnCl to final concentrations of 2.0  $\mu$ M in 20 mM phosphate buffer at different pH values and 25  $^{\circ}$ C. The final GdnHCl concentration was 0.16 M. (B) Full time course of 2.0  $\mu$ M TMR- $A\beta_{1-42}$  fluorescence in 20 mM phosphate buffer at different pH values. All buffers contained 1 mM EDTA and 5 mM  $\beta$ -mercaptoethanol ( $\beta$ ME). The experiments in B were performed with continuing stirring.

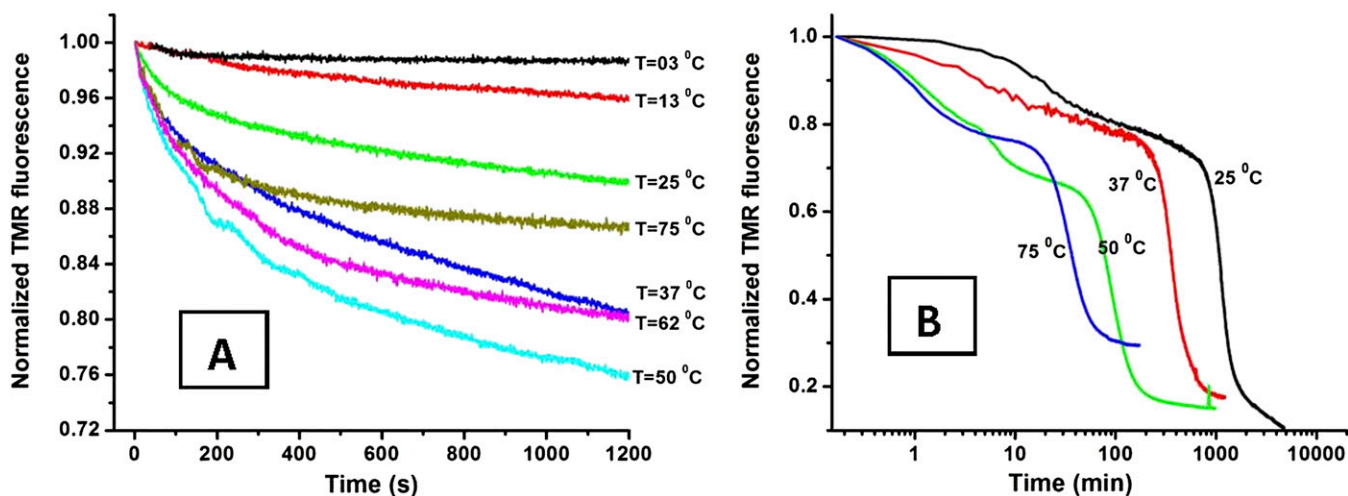

Fig. S2. Temperature dependence of oligomerization (A) and fibrillization (B) of TMR- $A\beta_{1-42}$ . (A) Time course of fluorescence change following dilution of a 100  $\mu$ M stock solution containing monomeric TMR- $A\beta_{1-42}$  prepared in 4 M GdnCl to final concentrations of 2.0  $\mu$ M in 20 mM phosphate buffer at pH 7.5 and various temperatures. The final GdnHCl concentration was 0.16 M. (B) Full time course of 2.0  $\mu$ M TMR- $A\beta_{1-42}$  fluorescence in 20 mM phosphate buffer, pH 7.5, containing 150 mM NaCl at various temperatures as shown. All buffers contained 1 mM EDTA and 5 mM  $\beta$ ME. The experiments in B were performed with continuing stirring. The abscissa of B is logarithmic.

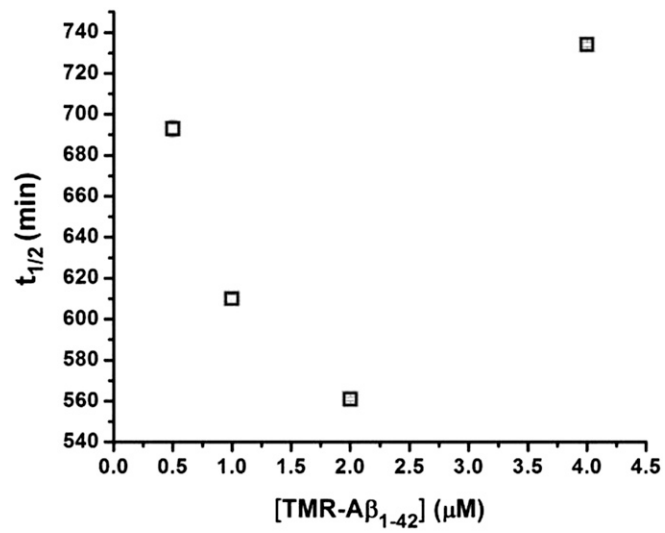

**Fig. S3.** Concentration-dependent half-time ( $t_{1/2}$ ) of the growth phase of TMR-A $\beta_{1-42}$ . The experiments were carried out in 20 mM phosphate buffer, pH 7.5, in the presence of 150 mM NaCl, 1 mM EDTA, and 5 mM  $\beta$ ME at 25 °C with continuous stirring. The half-time is relatively independent of TMR-A $\beta_{1-42}$  concentration.
